# Supplementary material
Source: MDPI journal article supplement (https://www.mdpi.com/2297-8739/6/1/8)
Supplement: s1 [file s1]

## Sheet: NaCl
		385nm				% Inhibition	Moisture content %	Dilution	Powder weight (g)	Volume (mL)	TIA (mgtrypsin/g defatted powder)	Mean TIA	SD TIA	mg BSA/g defatted Gac seed	Mean Protein	SD Protein	Specific TIA (mgtrypsin/mg protein)	Mean STIA	SD STIA
NaCl (M)	Repeat	Aa	Ab	Ac	Ad
0.01	1	0.2887	0.8805	0.2923	0.6092	46.4515	9.95	300	1.5	30	96.4026	92.773	5.13298	70.6488	70.6984	0.0701846	1.36453	1.31227	0.0739066
0.01	2	0.2887	0.8805	0.2908	0.6284	42.9537	9.95	300	1.5	30	89.1435			70.7481			1.26001
0.05	1	0.2887	0.8805	0.2245	0.5628	42.8354	9.95	500	1.5	30	148.163	148.806	0.909223	79.2977	79.1758	0.172429	1.86844	1.87946	0.0155767
0.05	2	0.2887	0.8805	0.2301	0.5662	43.2072	9.95	500	1.5	30	149.449			79.0538			1.89047
0.1	1	0.2887	0.8805	0.2299	0.5834	40.267	9.95	500	1.5	30	139.279	140.39	1.57048	86.9653	86.1408	1.16594	1.60155	1.63004	0.0402945
0.1	2	0.2887	0.8805	0.2301	0.5798	40.9091	9.95	500	1.5	30	141.5			85.3164			1.65854
0.3	1	0.2887	0.8805	0.2306	0.5524	45.6235	9.95	500	1.5	30	157.807	157.836	0.0413283	101.643	104.283	3.73371	1.55257	1.5145	0.0538285
0.3	2	0.2887	0.8805	0.2374	0.5591	45.6404	9.95	500	1.5	30	157.866			106.923			1.47644
0.5	1	0.2887	0.8805	0.2927	0.6222	44.3224	9.95	500	1.5	30	153.307	156.55	4.58744	118.802	119.519	1.0143	1.29044	1.30972	0.0272675
0.5	2	0.2887	0.8805	0.2889	0.6073	46.198	9.95	500	1.5	30	159.794			120.236			1.329
1	1	0.2887	0.8805	0.2868	0.5606	53.7344	9.95	450	1.5	30	167.275	158.044	13.0556	120.353	121.06	0.999774	1.38987	1.30599	0.11863
1	2	0.2887	0.8805	0.29	0.5989	47.8033	9.95	450	1.5	30	148.812			121.767			1.22211
	Time: 1h; Ratio 1.5g

## Sheet: Time
		385nm				% Inhibition	Moisture content %	Dilution	Powder weight (g)	Volume (mL)	TIA (mgtrypsin/g defatted powder)	Mean TIA	SD TIA	mg BSA/g defatted Gac seed	Mean Protein	SD Protein	Specific TIA (mgtrypsin/mg protein)	Mean STIA	SD STIA
Time (h)	Repeat	Aa	Ab	Ac	Ad
0.5	1	0.2912	0.8927	0.2941	0.5546	56.6916	9.95	300	1.5	30	119.583	120.056	0.669519	83.6188	83.1334	0.68642	1.43009	1.44422	0.0199782
0.5	2	0.2912	0.8927	0.2887	0.5465	57.1405	9.95	300	1.5	30	120.53			82.6481			1.45835
1	1	0.2912	0.8927	0.2899	0.5595	55.1787	9.95	400	1.5	30	155.189	158.602	4.82715	86.4977	85.8258	0.950246	1.79414	1.84838	0.0767084
1	2	0.2912	0.8927	0.2948	0.5498	57.606	9.95	400	1.5	30	162.015			85.1538			1.90262
2	1	0.2912	0.8927	0.2923	0.5341	59.8005	9.95	400	1.5	30	168.187	167.696	0.694316	87.9553	87.1308	1.16594	1.91219	1.92477	0.0177876
2	2	0.2912	0.8927	0.2925	0.5364	59.4514	9.95	400	1.5	30	167.205			86.3064			1.93735
3	1	0.2912	0.8927	0.2299	0.5834	41.2303	9.95	500	1.5	30	144.949	146.059	1.57048	84.6227	85.2228	0.84871	1.71288	1.71384	0.00136018
3	2	0.2912	0.8927	0.2301	0.5798	41.862	9.95	500	1.5	30	147.17			85.8229			1.71481
4	1	0.2912	0.8927	0.2927	0.6222	45.2203	9.95	450	1.5	30	143.078	145.998	4.1287	85.702	85.0193	0.965595	1.66949	1.71762	0.0680695
4	2	0.2912	0.8927	0.2889	0.6073	47.0657	9.95	450	1.5	30	148.917			84.3365			1.76575
5	1	0.2912	0.8927	0.2868	0.5606	54.4805	9.95	300	1.5	30	114.919	108.764	8.70374	84.453	84.5599	0.151246	1.36074	1.28633	0.105231
5	2	0.2912	0.8927	0.29	0.5989	48.6451	9.95	300	1.5	30	102.61			84.6669			1.21192
	Note: NaCl 0.1M; Ratio 1.5g

## Sheet: Ratio
		385nm				% Inhibition	Moisture content %	Dilution	Powder weight (g)	Volume (mL)	TIA (mgtrypsin/g defatted Gac seed)	Mean TIA	SD TIA	mg BSA/g defatted Gac seed	Mean Protein	SD Protein	Specific TIA (mgtrypsin/mg protein)	Mean STIA	SD STIA
Ratio (g/30mL)	Repeat	Aa	Ab	Ac	Ad
0.5	1	0.2839	0.82425	0.2896	0.5673	48.6074	9.95	400	1.5	30	122.809	125.638	4.00058	79.9488	80.0984	0.211606	1.5361	1.56848	0.0458022
0.5	2	0.2839	0.82425	0.2892	0.5548	50.8467	9.95	400	1.5	30	128.467			80.2481			1.60087
1	1	0.2839	0.82425	0.2835	0.5064	58.749	9.95	450	1.5	30	166.986	164.698	3.23601	91.2977	90.1758	1.58664	1.82903	1.82638	0.00375044
1	2	0.2839	0.82425	0.2849	0.5165	57.1389	9.95	450	1.5	30	162.41			89.0538			1.82373
2	1	0.2839	0.82425	0.2838	0.5012	59.7668	9.95	450	1.5	30	169.879	165.829	5.7281	86.9653	86.1408	1.16594	1.95342	1.92482	0.0404441
2	2	0.2839	0.82425	0.2854	0.5182	56.9168	9.95	450	1.5	30	161.779			85.3164			1.89622
3	1	0.2839	0.82425	0.2885	0.5214	56.8983	9.95	450	1.5	30	161.726	162.278	0.781105	86.9653	86.9441	0.029927	1.85966	1.86647	0.00962645
3	2	0.2839	0.82425	0.2909	0.5217	57.2869	9.95	450	1.5	30	162.831			86.9229			1.87328
4	1	0.2839	0.82425	0.2299	0.4814	53.4561	9.95	450	1.5	30	151.942	151.889	0.074391	81.6427	82.7828	1.61239	1.86106	1.83515	0.0366424
4	2	0.2839	0.82425	0.2301	0.4818	53.4191	9.95	450	1.5	30	151.837			83.9229			1.80924
6	1	0.2839	0.82425	0.2927	0.5922	44.573	9.95	450	1.5	30	126.693	124.352	3.3104	77.802	77.0193	1.10702	1.6284	1.61441	0.0197771
6	2	0.2839	0.82425	0.2889	0.5973	42.9259	9.95	450	1.5	30	122.011			76.2365			1.60043
	Note: NaCl 0.1M; Time 1h
